# Supplementary material for: Unwinding the mechanism of macrophage repolarization potential of Oceanimonas sp. BPMS22-derived protein protease inhibitor through Toll-like receptor 4 against experimental visceral leishmaniasis
Source: Frontiers journal article supplement (doi:10.3389/fcimb.2023.1120888), 2023-03-22
Supplement: Data_Sheet_1.PDF [file Data_Sheet_1.PDF]

## **Supplementary Data/Information**

**Unwinding the mechanism of macrophage repolarization potential of *Oceanimonas sp.* BPMS22-derived protein protease inhibitor through toll-like receptor 4 against experimental visceral leishmaniasis**

Adithyan Jayaraman<sup>1</sup>, Sujatha Srinivasan<sup>1</sup>, Kiran Babu Uppuluri<sup>1\*</sup>, Santanu Kar Mahapatra<sup>1,2\*</sup>

<sup>1</sup>Department of Biotechnology, School of Chemical and Biotechnology, SASTRA Deemed to be University, Thanjavur 613 401, India.

<sup>2</sup>Department of Paramedical and Allied Health Sciences, Midnapore City College, Midnapore-721 129, India.

**Address for correspondence:**

Dr. Santanu Kar Mahapatra: Email: [sailar.santanu@gmail.com](mailto:sailar.santanu@gmail.com)

Dr. Kiran Babu Uppuluri: [kinnubio@gmail.com](mailto:kinnubio@gmail.com)

**Supplementary table S1: TLR Genes, corresponding primer sequences and melting temperature**

**PCR conditions:**

Initial Denaturation: 95°C for 5 min

Denaturation: 95°C for 30 sec

Annealing: @T<sub>m</sub> for 30sec

Extension:72°C for 1 min

Total: 40 cycles

| <b>Genes</b> | <b>Sequence (5'-3')</b>                                                            | <b>Melting temperature (T<sub>m</sub>)</b> |
|--------------|------------------------------------------------------------------------------------|--------------------------------------------|
| TLR-1        | F:5'- CAA TGT GGA AAC AAC GTG GA-3'<br>R:5'-TGT AAC TTT GGG GGA AGC TG-3'          | 60.0°C                                     |
| TLR-2        | F:5'- AAG AGG AAG CCC AAG AAA GC-3'<br>R:5'-CGA TGG AAT CGA TGA TGT TG-3'          | 62.0°C                                     |
| TLR-3        | F:5'- TCC TTG CGT TGC GAA GTG AA-3'<br>R:5'-TTG GGC GTT GTT CAA GAG GA-3'          | 66.0°C                                     |
| TLR-4        | F:5'-ACC TGG CTG GTT TAC ACG TC-3'<br>R:5'-CTG CCA GAG ACA TTG CAG AA-3'           | 52.0°C                                     |
| TLR-5        | F:5'-CAA CCA AAC CAA CGT CAC CCT GTT-3'<br>R:5'-TGG CTT CCT CTT CAT CGC AGT CTT-3' | 68.0°C                                     |
| TLR-6        | F:5'- TTG TTT GCG CCC TGG CCT TAA T-3'<br>R:5'-TGT TCT TGG TGG CAG GTC TTT G-3'    | 67.0°C                                     |
| TLR-7        | F:5'- TGC AAC TGT GAT GCT GTG TGG T-3'<br>R:5'-TTT GAC CTT TGT GTG CTC CTG G-3'    | 67.0°C                                     |
| TLR-8        | F:5'-TGC CAA ACA ACA GCA CCC AA-3'<br>R:5'-TCA AAG ACT CAG GCA ACC CA-3'           | 64.0°C                                     |
| TLR-9        | F:5'- ACT GAG CAC CCC TGC TTC TA-3'<br>R:5'-AGA TTA GTC AGC GGC AGG AA-3'          | 62.0°C                                     |
| TLR-11       | F:5'- CTG AAG GTG AAG GCT TGA GGT T-3'<br>R:5'-CCT GTC ATT TCC AAT CCC AAA-3'      | 60.0°C                                     |
| TLR-12       | F:5'- TTG AGC TGC AGG GCT TGA TTG T-3'<br>R:5'-GCT TGG TTA GGC CAG TGC TTG AAA-3'  | 63.0°C                                     |
| TLR-13       | F:5'- ACA CAG TGA ATG GTG CCG ACT T-3'<br>R:5'-AAA GTG GCT GCT GGT GAA CAC T-3'    | 62.0°C                                     |
| GAPDH        | F:5'-GAG CCA AAC GGG TCA TCA TC-3'<br>R:5'-CCT GCT TCA CCA CCT TCT TG-3'           | 59.0°C                                     |

**Supplementary table S2: M1/M2 and cytokines genes, corresponding primer sequences**

| <b>Genes</b>  | <b>Sequence (5'-3')</b>                                         | <b>Melting temperature (T<sub>m</sub>)</b> |
|---------------|-----------------------------------------------------------------|--------------------------------------------|
| FIZZ1         | F: TGC TGG GAT GAC TGC TAC TG<br>R: CTG GGT TCT CCA CCT CTT CA  | 55.0°C                                     |
| MSR-2         | F: AAA GTC AGC GTT CCC AGA GA<br>R: GGT GAT GTT CAC GAT TGC AC  | 53.0°C                                     |
| CD68          | F: GAA AGG GCT TCC CATTCTC<br>R: TCA AGC CAT TGG TTT TCA CA     | 51.0°C                                     |
| YM-1          | F: GAA GGA GCC ACT GAG GTC TG<br>R: CAC GGC ACC TCC TAA ATT GT  | 55.0°C                                     |
| CD86          | F: GTC TGG AGA ATG CTG TGC AA<br>R: GCT CAG ACC TGC CAA AGT TC  | 54.0°C                                     |
| CCL-19        | F: ATT CCA GTC ACT CCC CTG TG<br>R: GCC TTT GTT CTT GGC AGA AG  | 53.0°C                                     |
| CD163         | F: CAT GTC TCT GAG GCT GAC CA<br>R: TGC ACA CGA TCT ACC CAC AT  | 55.0°C                                     |
| CD206/ MRC1   | F: ATG CCA AGT GGG AAA ATC TG<br>R: TGT AGC AGT GGC CTG CAT AG  | 54.0°C                                     |
| ARG-1         | F: CAG AAG AAT GGA AGA GTC AG<br>R: CAG ATA TGC AGG GAG TCA CC  | 52.0°C                                     |
| iNOS2         | F: CAG AGG ACC CAG AGA CAA GC<br>R: AAG ACC AGA GGC AGC ACA TC  | 61.0°C                                     |
| IL-12         | F: CAC GCC TGA AGA AGA TGA CA<br>R: GAC AGA GAC GCC ATT CCA CA  | 60.0°C                                     |
| IFN- $\gamma$ | F: CCT GCT TCA CCA CCT TCT TG<br>R: CGA CTC CTT TTC CGC TTC CT  | 59.0°C                                     |
| IL-10         | F: TCA CTC TTC ACC TGC TCC AC<br>R: CTA TGC TGC CTG CTC TTA CTC | 55.0°C                                     |
| TGF- $\beta$  | F: TTG CTT CAG CTC CAC AGA GA<br>R: TGG TTG TAG AGG GCA AGG AC  | 56.0°C                                     |
| GAPDH         | F: GAG CCA AAC GGG TCA TCA TC<br>R: CCT GCT TCA CCA CCT TCT TG  | 59.0°C                                     |

Supplementary Figure S1: Molecular interaction of PPI and TLRs of host immune system

A.

| S.no | Toll-like receptor | Representative | Binding energy  |
|------|--------------------|----------------|-----------------|
| 1    | TLR-4              | Lowest energy  | -1344 kcal/mole |

B.

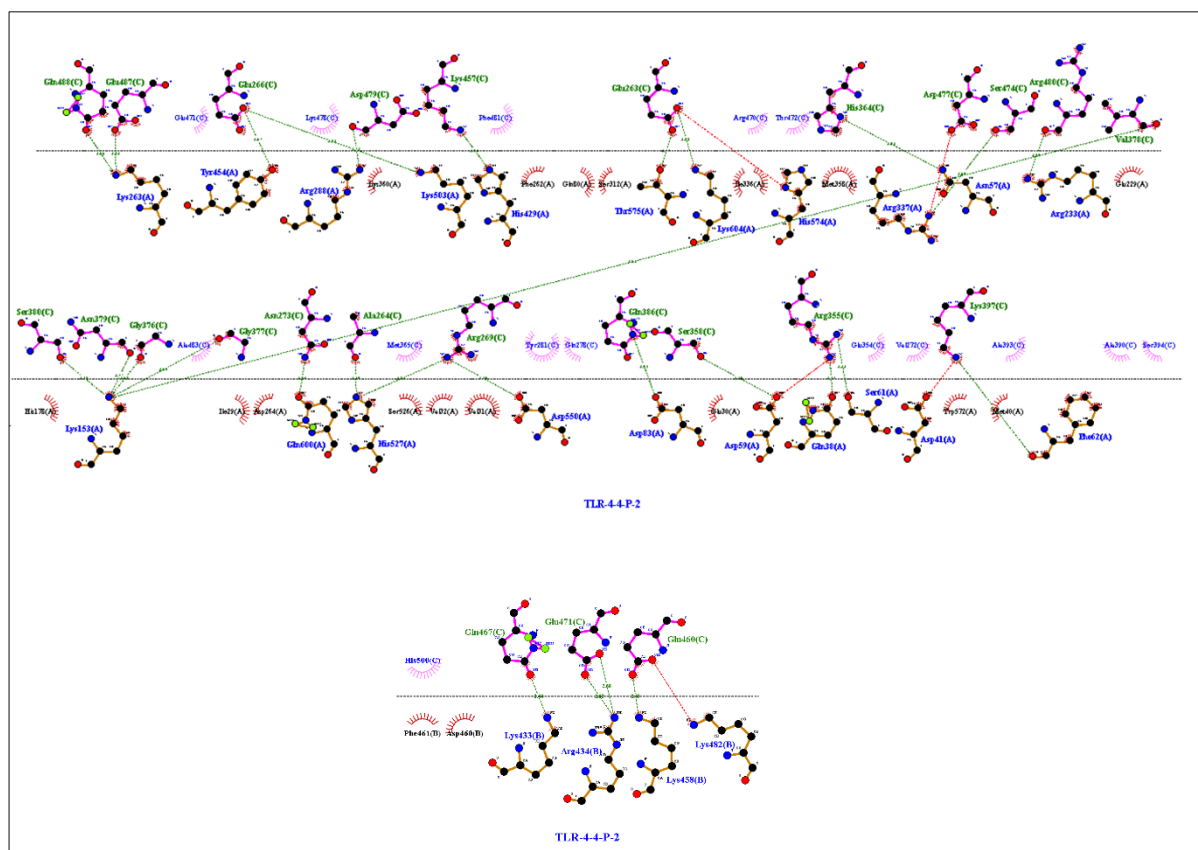

Supplementary Figure S1: Molecular interaction of PPI and TLRs of host immune system using Cluspro v2.0 (A) Table shows binding energy values. The BPMS22-PPI interaction residues to TLRs were implemented using the DIMPLOT software from Ligplot version 2.1. (B) TLR-4-4-BPMS22-PPI

**Supplementary Figure S2: Effect of PPI on cytokine secretion in presence or absence of TLR-4 shRNA with or without *L. donovani* infected BALB/c mice model**

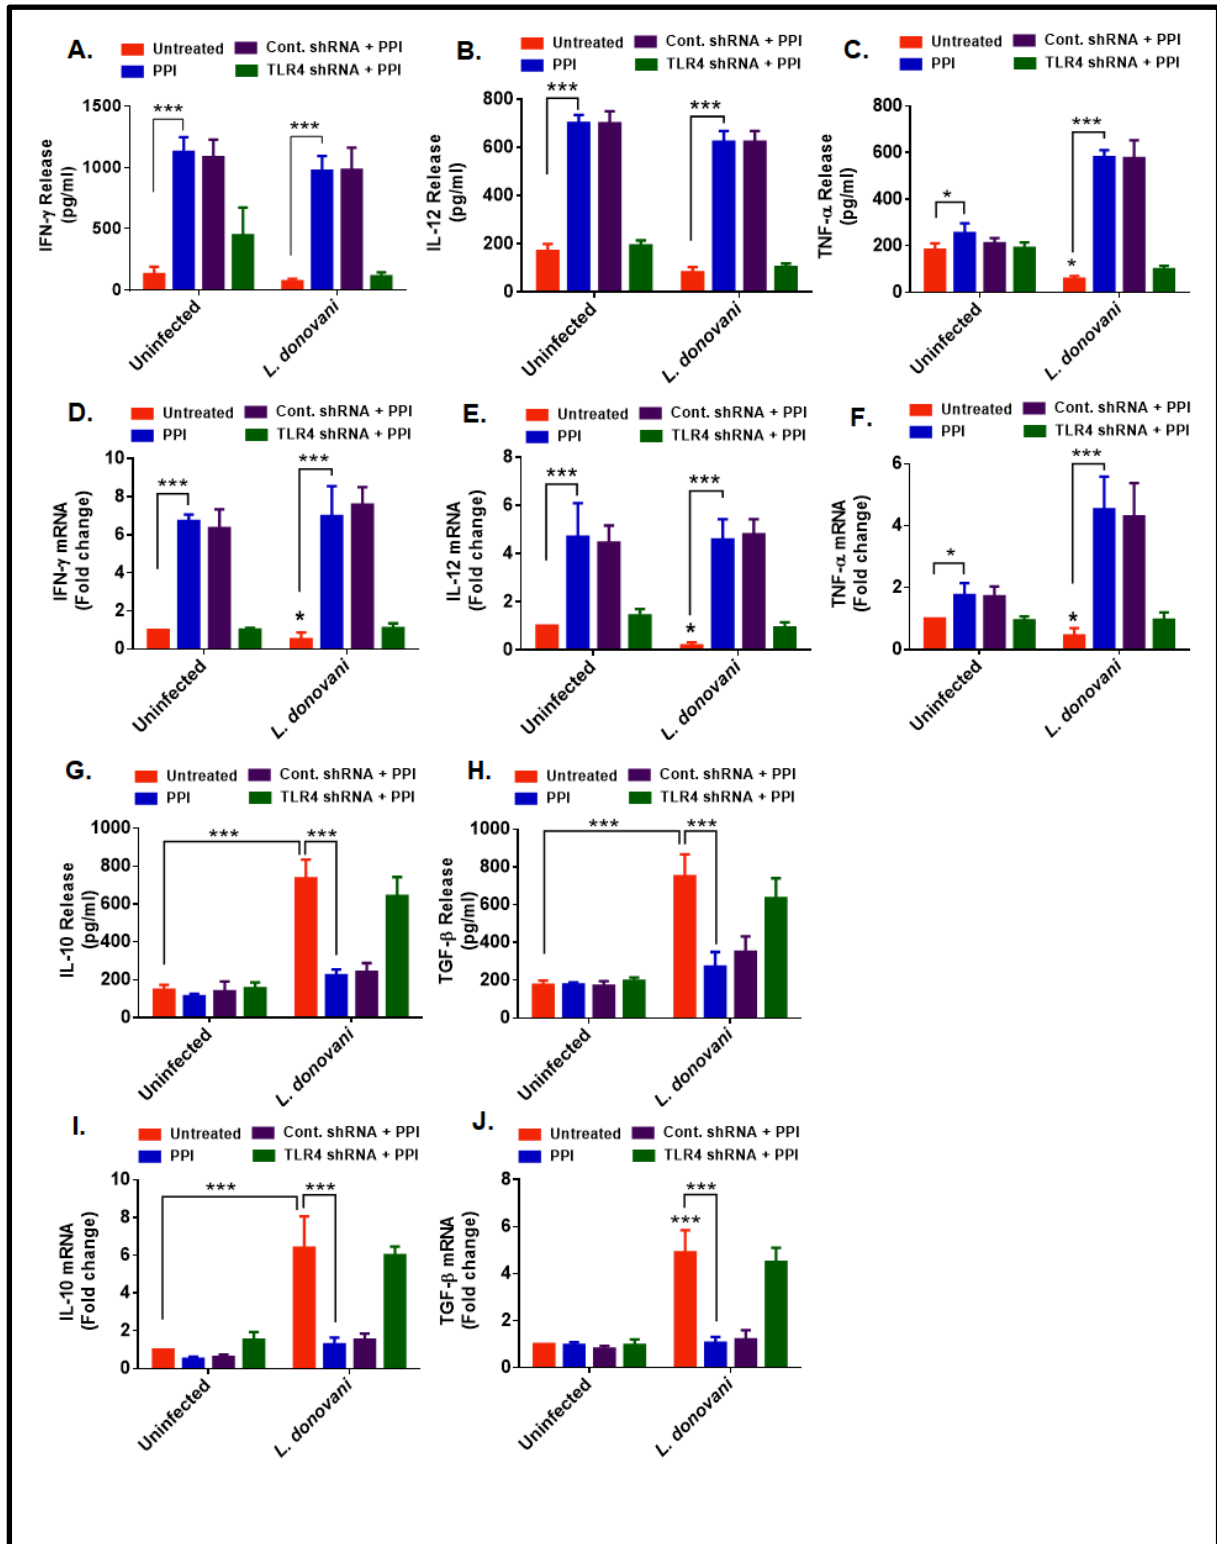

**Supplementary Figure S2: Effect of PPI on Th1 and Th2 cytokine response in *L. donovani* infected BALB/c mice.** BALB/c mice (6-8 weeks old) were transfected with TLR4 shRNA, infected with *L. donovani* promastigotes, and treated with PPI (1 mg/kg B.W.) for a total of 4

doses in alternative two days. On the 15<sup>th</sup> day of the last dose of treatment, mice were sacrificed. Splenocytes were isolated from each group and re-stimulated with 10 µg/ml of SLA. After 48 h of SLA stimulation, the level of nitrite and cytokines was estimated from the cell-free supernatant. After 4 h of SLA stimulation, cells were collected in Trizol and isolated the total RNA. Then the mRNA expression was studied by real-time PCR using gene-specific primers. All the results were expressed as mean ± SD. \*p < 0.05, \*\*p < 0.01, and \*\*\*p < 0.001.
